# Supplementary material for: Gossypium barbadense genome sequence provides insight into the evolution of extra-long staple fiber and specialized metabolites
Source: PubMed Central journal article supplement (PMC4588572; doi:10.1038/srep14139), 2015-09-30
Supplement: srep14139-s2.pdf [file srep14139-s2.pdf]

## ***Gossypium barbadense* genome sequence provides insight into the evolution of extra-long staple fiber and specialized metabolites**

Xia Liu<sup>1,†</sup>, Bo Zhao<sup>2,†</sup>, Hua-Jun Zheng<sup>3,†</sup>, Yan Hu<sup>4,†</sup>, Gang Lu<sup>3</sup>, Chang-Qing Yang<sup>2</sup>, Jie-Dan Chen<sup>4</sup>, Jun-Jian Chen<sup>1</sup>, Dian-Yang Chen<sup>2</sup>, Liang Zhang<sup>3</sup>, Yan Zhou<sup>3,5</sup>, Ling-Jian Wang<sup>2</sup>, Wang-Zhen Guo<sup>4</sup>, Yu-Lin Bai<sup>1</sup>, Ju-Xin Ruan<sup>2</sup>, Xiao-Xia Shangguan<sup>2</sup>, Ying-Bo Mao<sup>2</sup>, Chun-Min Shan<sup>2</sup>, Jian-Ping Jiang<sup>3</sup>, Yong-Qiang Zhu<sup>3</sup>, Lei Jin<sup>3</sup>, Hui Kang<sup>3</sup>, Shu-Ting Chen<sup>3</sup>, Xu-Lin He<sup>3</sup>, Rui Wang<sup>3</sup>, Yue-zhu Wang<sup>3</sup>, Jie Chen<sup>3</sup>, Li-jun Wang<sup>3</sup>, Shu-Ting Yu<sup>3</sup>, Bi-Yun Wang<sup>3</sup>, Jia Wei<sup>3</sup>, Si-Chao Song<sup>3</sup>, Xin-Yan Lu<sup>3</sup>, Zheng-Chao Gao<sup>3</sup>, Wen-Yi Gu<sup>3</sup>, Xiao Deng<sup>6</sup>, Dan Ma<sup>4</sup>, Sen Wang<sup>4</sup>, Wen-Hua Liang<sup>4</sup>, Lei Fang<sup>4</sup>, Cai-Ping Cai<sup>4</sup>, Xie-Fei Zhu<sup>4</sup>, Bao-Liang Zhou<sup>4</sup>, Z. Jeffrey Chen<sup>4,8</sup>, Shu-Hua Xu<sup>7</sup>, Yu-Gao Zhang<sup>1,\*</sup>, Sheng-Yue Wang<sup>3,\*</sup>, Tian-Zhen Zhang<sup>4,\*</sup>, Guo-Ping Zhao<sup>2,3,5,\*</sup> & Xiao-Ya Chen<sup>2,\*</sup>

<sup>1</sup>Esquel Group, 25/F Eastern Cenrtal Plaza, 3 Yin Hing Road, Shau Kei Wan, Hongkong, China.

<sup>2</sup>National Key Laboratory of Plant Molecular Genetics, National Plant Gene Research Center, Institute of Plant Physiology and Ecology, Shanghai Institutes for Biological Sciences, Chinese Academy of Sciences, Shanghai 200032, China.

<sup>3</sup>Shanghai–Ministry of Science and Technology Key Laboratory of Health and Disease Genomics, Chinese National Human Genome Center at Shanghai, Shanghai 201203, China.

<sup>4</sup>Nanjing Agricultural University, Nanjing, Jiangsu 210095, China.

<sup>5</sup>State Key Laboratory of Genetic Engineering, School of Life Sciences, Fudan University, Shanghai 200433, China.

<sup>6</sup>The Institutes of Biology and Medical Sciences, Soochow University, Suzhou, Jiangsu 214123, China.

<sup>7</sup>Max Planck Independent Research Group on Population Genomics, Chinese Academy of Sciences and Max Planck Society (CAS-MPG) Partner Institute for Computational Biology (PICB), Shanghai Institutes for Biological Sciences, Chinese Academy of Sciences, Shanghai 200031, China.

<sup>8</sup>Institute for Cellular and Molecular Biology and Center for Computational Biology and Bioinformatics, The University of Texas at Austin, Austin, Texas 78712, USA.

†These Authors contributed equally to this work

\*Corresponding Author: [xychen@sibs.ac.cn](mailto:xychen@sibs.ac.cn); [gpzhao@sibs.ac.cn](mailto:gpzhao@sibs.ac.cn); [cotton@njau.edu.cn](mailto:cotton@njau.edu.cn); [wangsy@chgc.sh.cn](mailto:wangsy@chgc.sh.cn); [zhangyu@esquel.com](mailto:zhangyu@esquel.com)

## Supplementary Figure 1

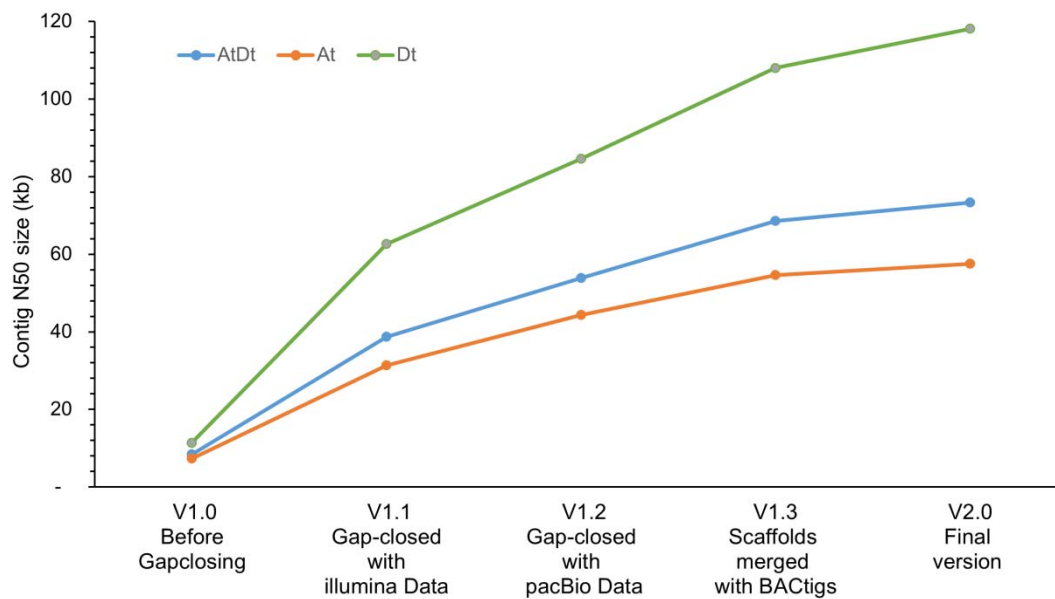

**Supplementary Figure 1. Gap-closing efficiency of different types of reads.** Starting with initial V1.0 assembly, multiple gap closing procedures were implemented to improve assembly continuity. Illumina paired-ends were used to close most small gaps in the starting version, then the PacBio SMRT sequencing data and contigs from BAC pools (BACTigs) were merged to close remaining gaps with relative bigger sizes.

## Supplementary Figure 2

a

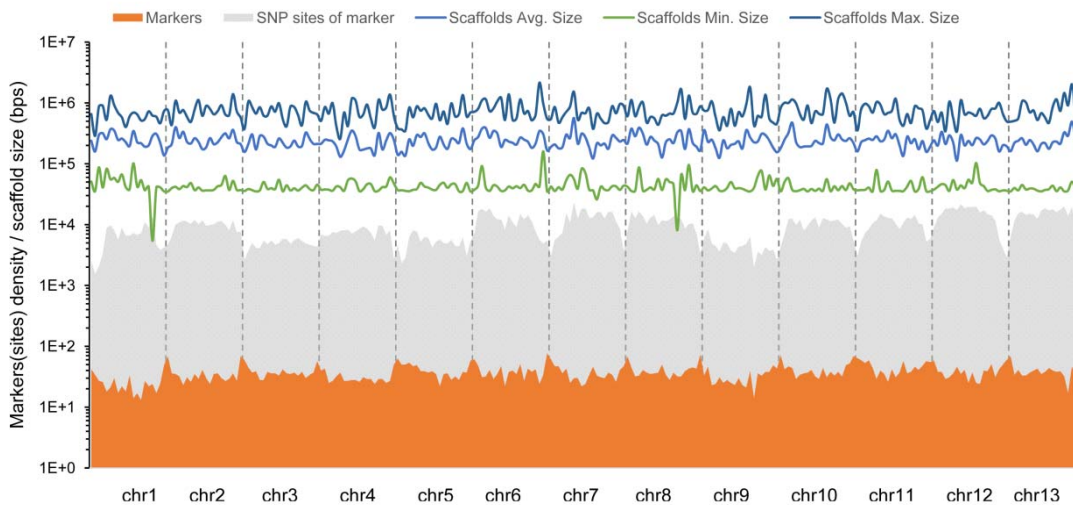

b

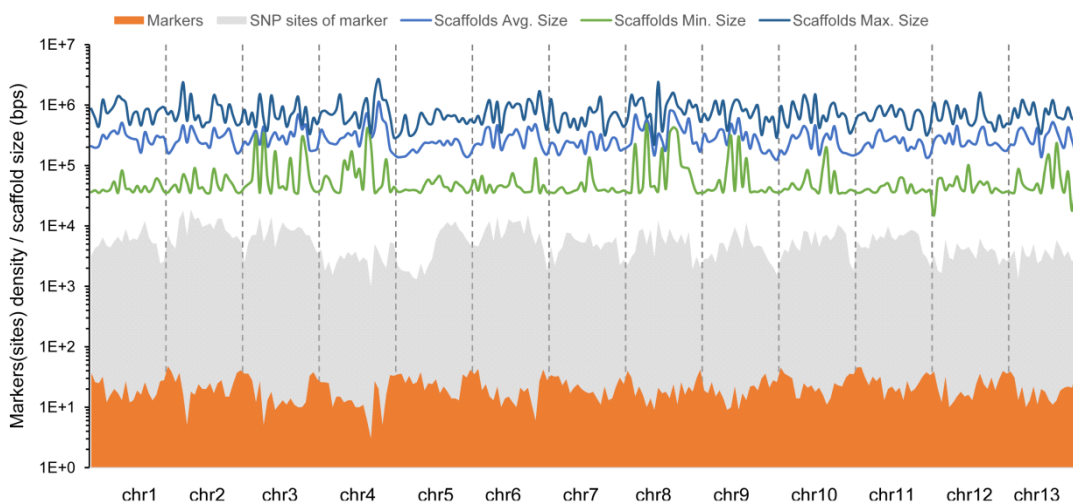

### Supplementary Figure 2. Scaffolds coverage based on genetic maps of 13 $A_1$ (a) and 13 $D_1$ (b) chromosomes.

Scaffold sizes across chromosomes are represented by three lines, standing for max (indigo), average (blue) and minimal (green) scaffold sizes, respectively. The density of SNP sites and the corresponding genetic marks (bins of SNPs mapped to contigs) are demonstrated as gray plots and orange, respectively. Calculations were performed with window of 1/20 of chromosome size.

### Supplementary Figure 3

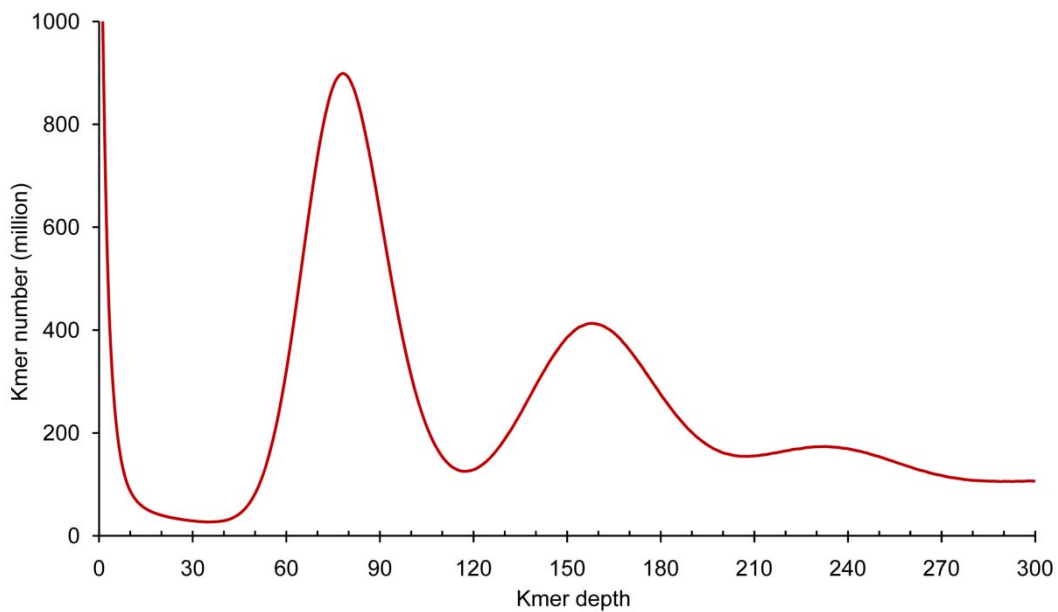

**Supplementary Figure 3. 17-mer histogram analysis of *G. barbadense* reads.** Data from two Illumina paired-end (PE) libraries with insert sizes of 180 bp and 300 bp were used to construct the histogram graph. Totally 390.3 Giga kmers were acquired, with observed average depth peak at 158 fold, adding up to 2.47 Gb genome size according to the equation of  $L/C = G$  (where L stands for k-mer number, C for average depth and G for genome size to be determined).

Supplementary Figure 4

a

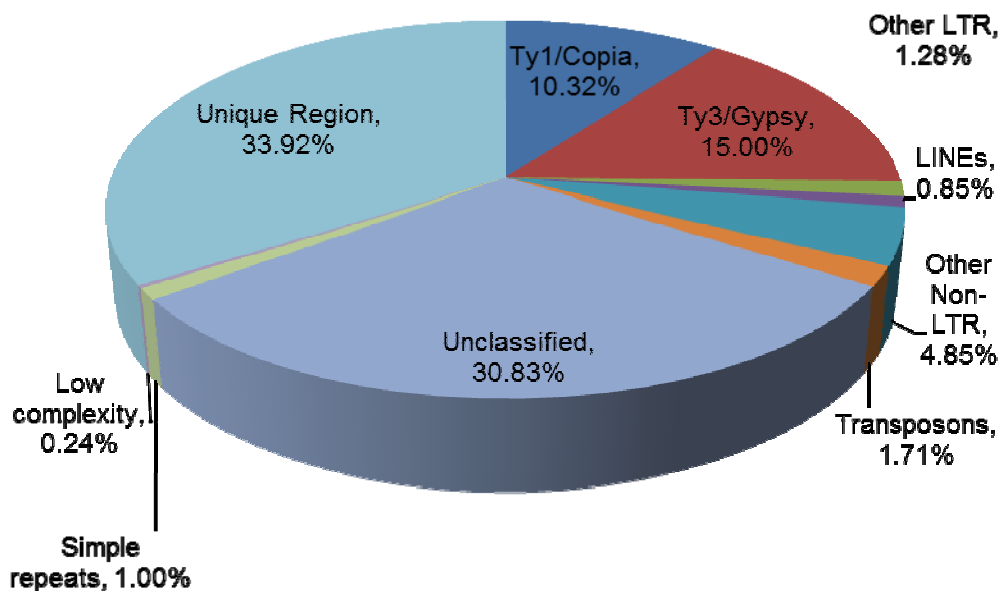

b

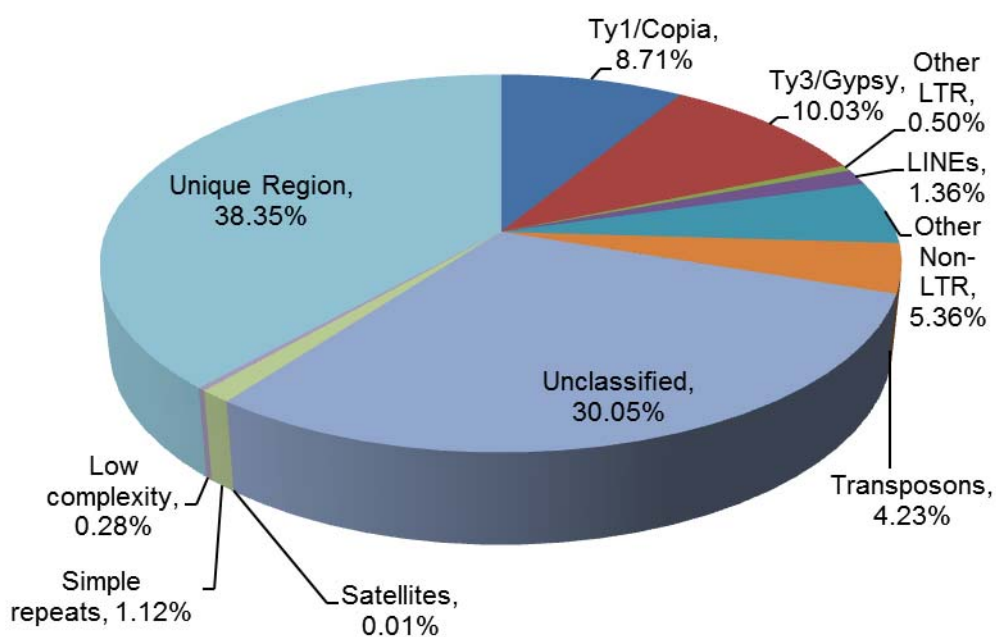

Supplementary Figure 4. Distribution of repeats in the *G. barbadense* genome. (a)  $A_t$  subgenome. (b)  $D_t$  subgenome. LTR retrotransposons are divided into Ty1, Ty3, Lines and other LTRs.

## Supplementary Figure 5

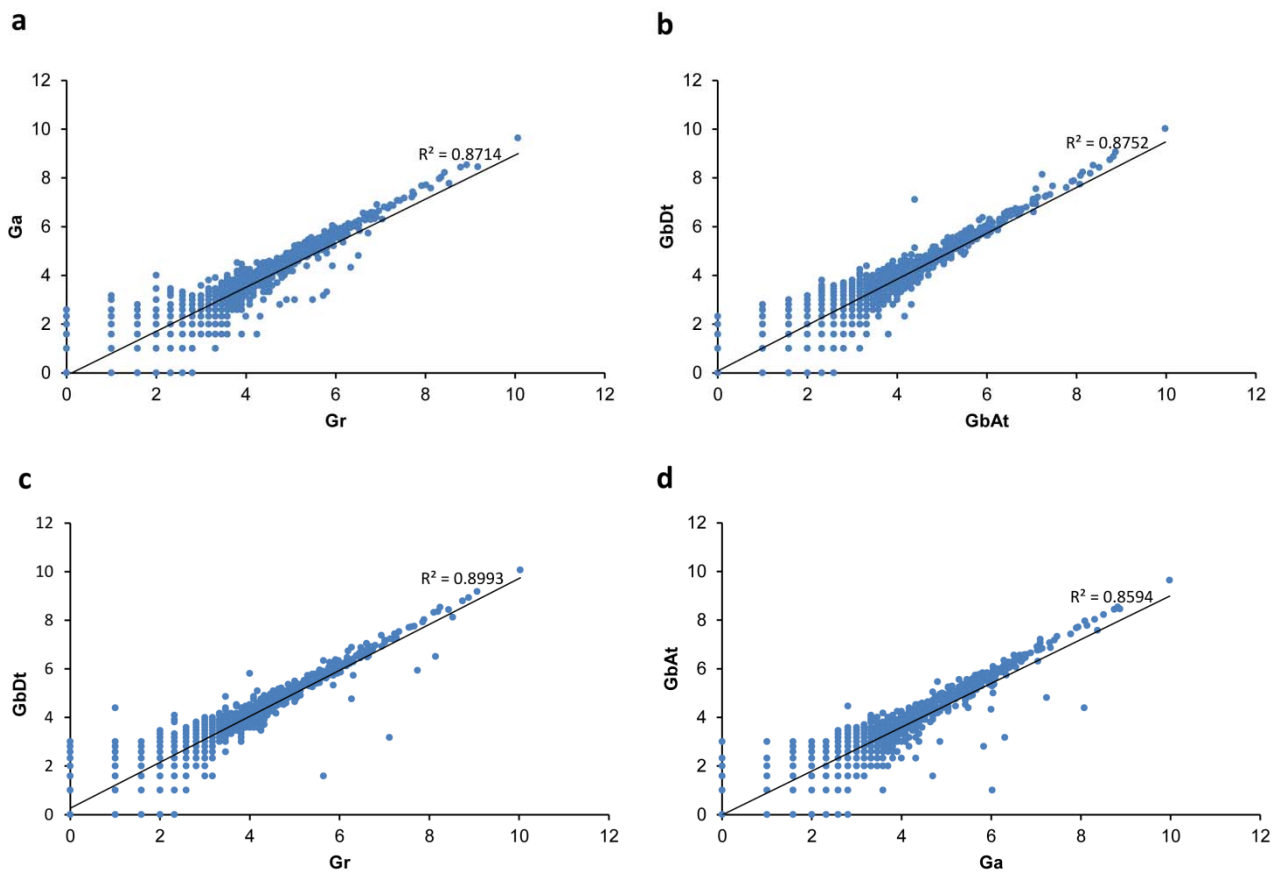

**Supplementary Figure 5. Relations of Pfam domain families among cotton genomes.** (a) Domain distribution between A and D genomes of diploid cotton species. (b) Domain distribution between  $A_t$  and  $D_t$  subgenomes in allotetraploid cotton *G. barbadense*. (c) Domain distribution between D genome of diploid cotton *G. raimondii* and  $D_t$  subgenome in *G. barbadense*. (d) Domain distribution between A genome of diploid cotton *G. arboreum* and  $A_t$  subgenome of *G. barbadense*. Each dot represents a Pfam domain family, and the number on the axes is  $\log_2$  of the number of genes in each family. Ga: *G. arboreum*, Gb: *G. barbadense*, Gr: *G. raimondii*.

# Supplementary Figure 6

a

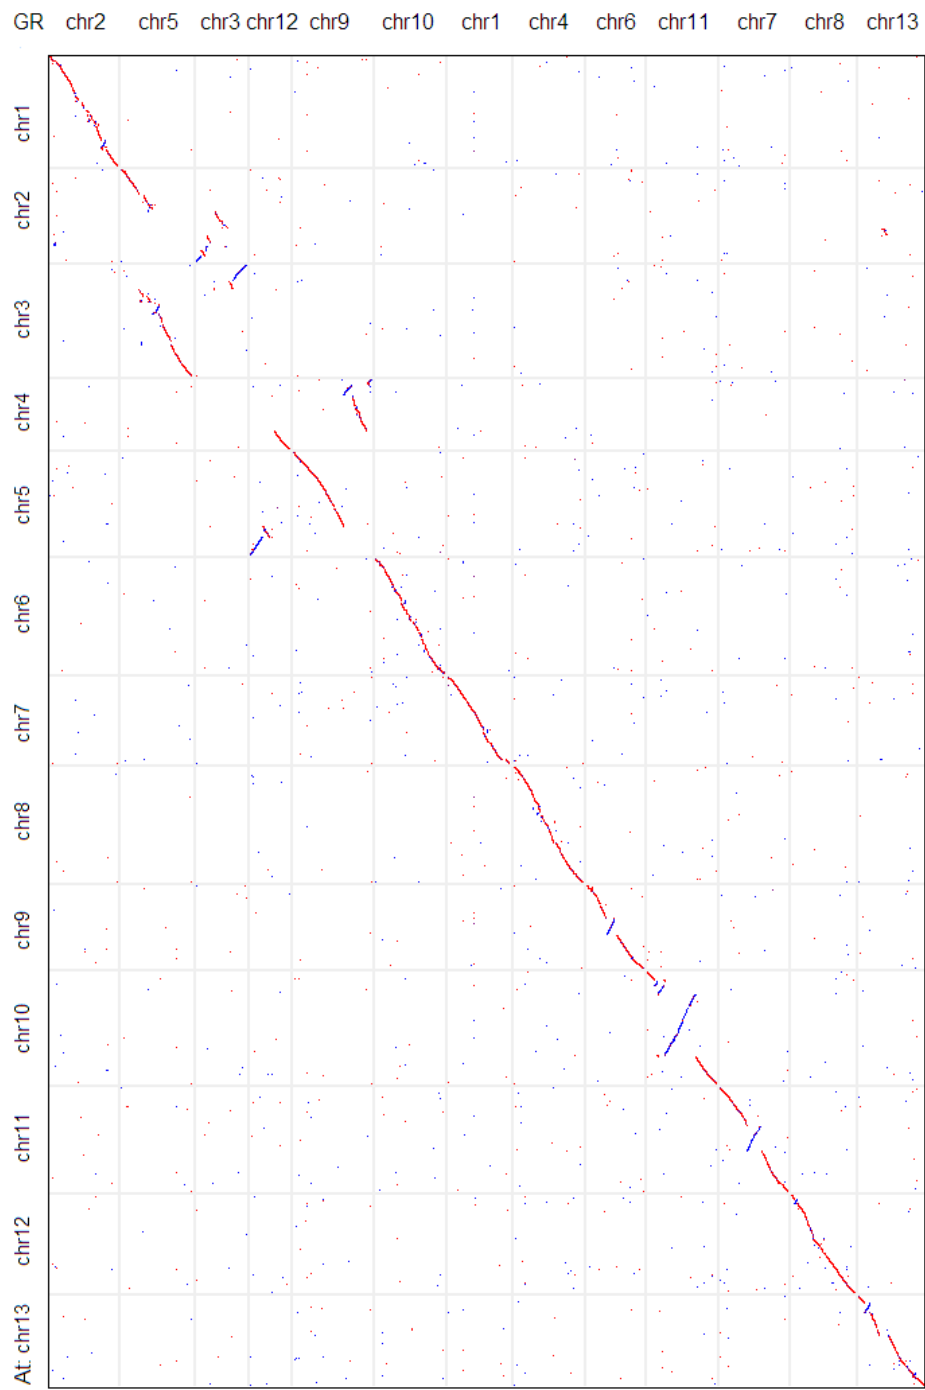

## Supplementary Figure 6

**b**

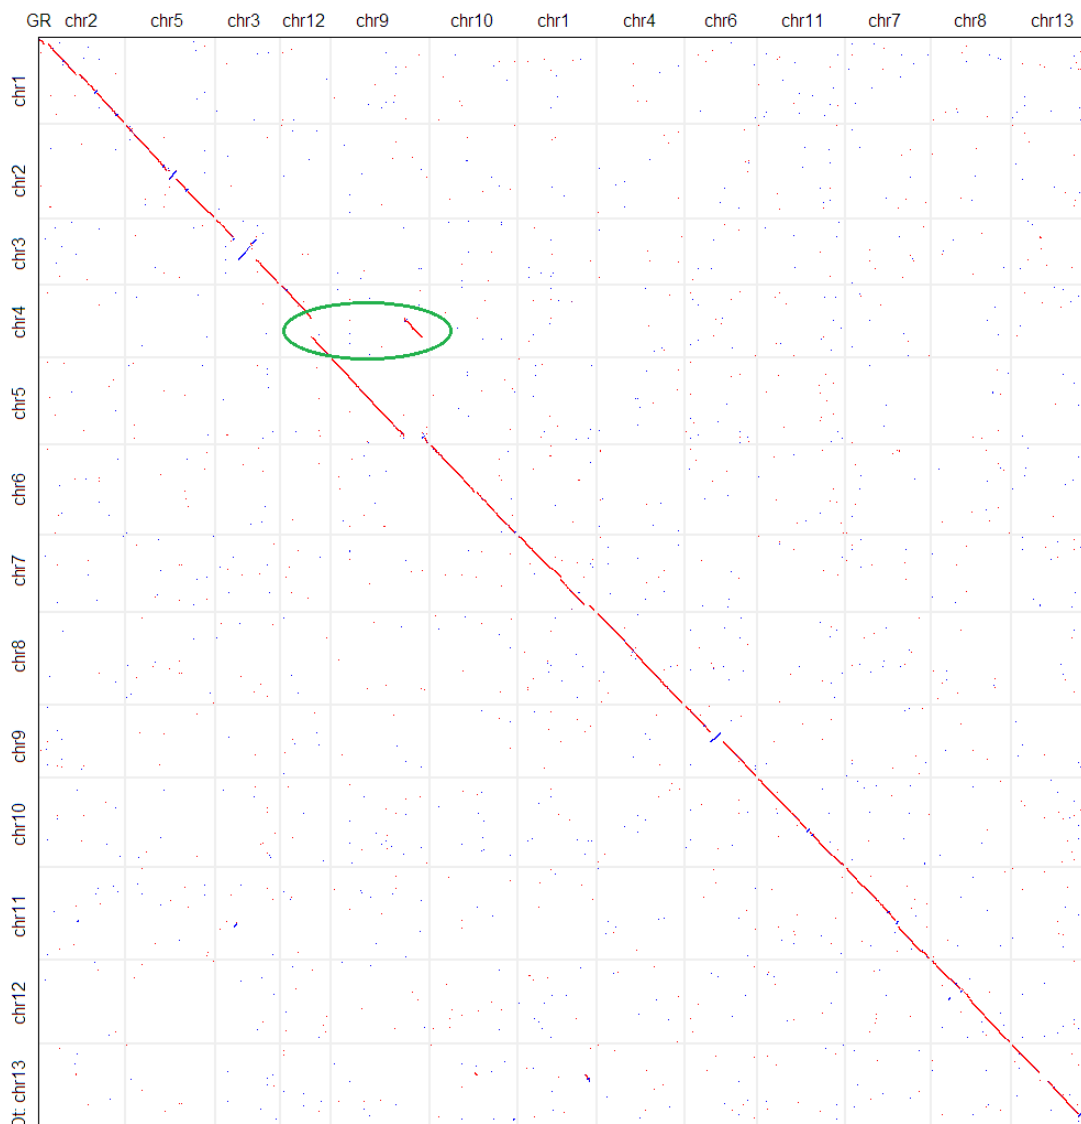

**Supplementary Figure 6. Dot plots of diploid and tetraploid cotton genomes.** Chromosome mapping between *G. raimondii* and *G. barbadense* A<sub>t</sub> subgenome (a), and between *G. raimondii* and *G. barbadense* D<sub>t</sub> (b). A<sub>t</sub>01~A<sub>t</sub>13, or D<sub>t</sub>01~D<sub>t</sub>13, of *G. barbadense* are placed from top to down on y-axis, while the corresponding chromosomes from *G. raimondii* are placed on x-axis. In graph, forward matches are marked as red, and reversed as blue. A<sub>t</sub>02/A<sub>t</sub>03, A<sub>t</sub>04/A<sub>t</sub>05 reciprocal translocations are clearly shown in dot plots map (a), and an ancenral translocation of D<sub>t</sub>04/D<sub>t</sub>05 caused a jump of syntenic block is circled by ellipse (b). The dot plots were generated by alignment of nucleotide sequences, and each dot represents a portion of the genome or subgenome (eg., 1/1000).



## Supplementary Figure 7

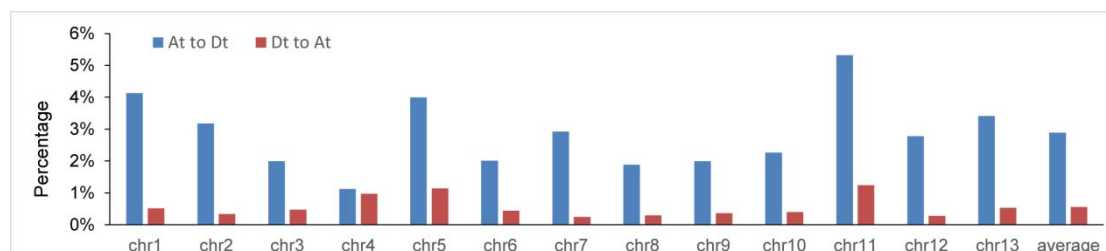

**Supplementary Figure 7. Statistics of inter-subgenome translocations.** Blue bar stands for  $D_t$  sequences translocated from  $A_t$ , whereas darkred represents sequences translocated from  $D_t$  to  $A_t$ . Chromosome numbers are lined up in x-axis and the percentage of translocated region divided by total chromosome size is given in y-axis. According to data-grouping analysis, reads groups marked with  $A_t$  or  $D_t$  were separately assembled into contigs and scaffolds, and scaffolds were then anchored to chromosomes by genetic markers. Only very small portion of sequences (~20-Mb) presented some contradictions between the assembly grouping and the genetic marker location, i.e., a scaffold from  $A_t$  assembly had a  $D_t$  chromosome linked genetic marker, or *vice versa*. Despite the existence of sequencing error, mis-grouping sequences, low confidence SNP markers and other potential translocated regions were determined by realignment to two reference genomes (*G. aboreum* and *G. raimondii*). Sequences with higher similarity to one of these two subgenomes are believed to have originated from its corresponding progenitor of the subgenome, and, when conflicted, they may indicate the existence of inter-subgenome translocation.

Supplementary Figure 8

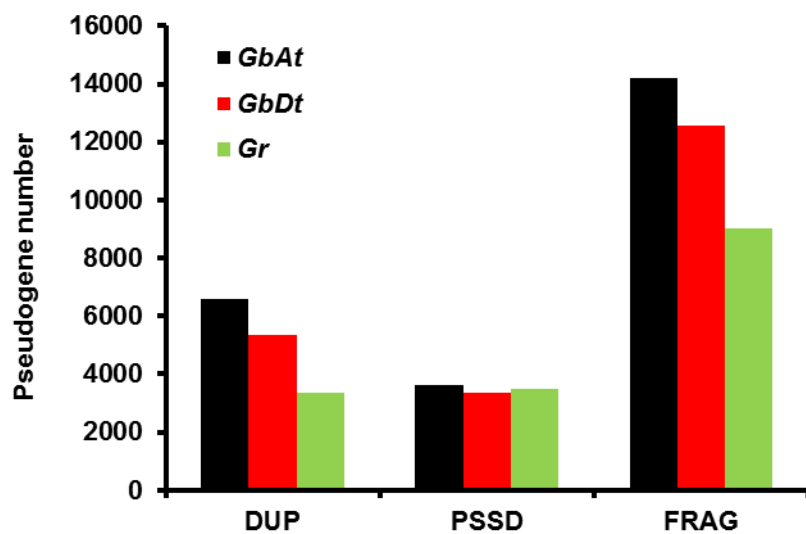

**Supplementary Figure 8. Three categories of predicted pseudogenes.** DUP: duplicated, PSSD: processed, FRAG: fragmented. Duplicated pseudogenes are commonly derived from gene duplication, processed pseudogenes are generated by the integration of reversed-transcribed cDNA into genomes, and fragmented pseudogenes are those that cannot be assessed as processed or duplicated. For reference, see Zhang et al., *Bioinformatics* **22**, 1437-1439 (2006).

Supplementary Figure 9

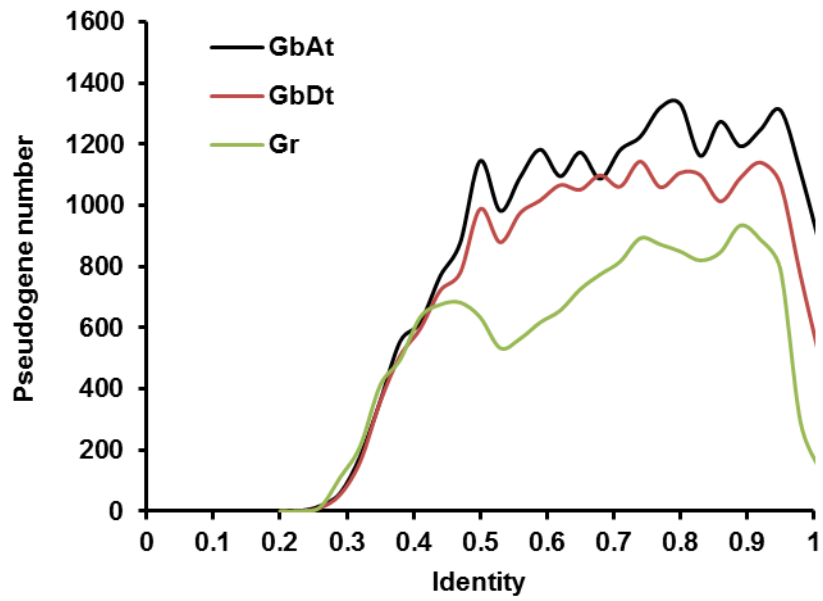

**Supplementary Figure 9. Alignment of pseudogenes to their closest functional genes.** Identity was calculated based on blastn between the pseudogenes and its parental genes. Gb: *Gossypium barbadense*, Gr: *Gossypium raimondii*.

## Supplementary Figure 10

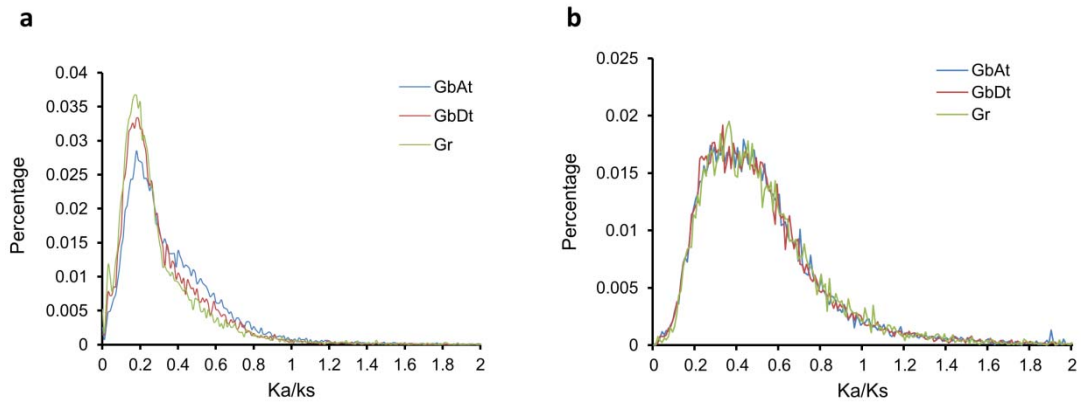

**Supplementary Figure 10. Strength of purifying selection on predicted protein-coding genes and pseudogenes. (a)** *Ka/Ks* distribution of functional gene paralogs. Data are grouped in 0.01 unit. **(b)** *Ka/Ks* distribution of pseudogenes and their closest functional paralogs. Data are grouped in 0.01 unit.

# Supplementary Figure 11

**a**

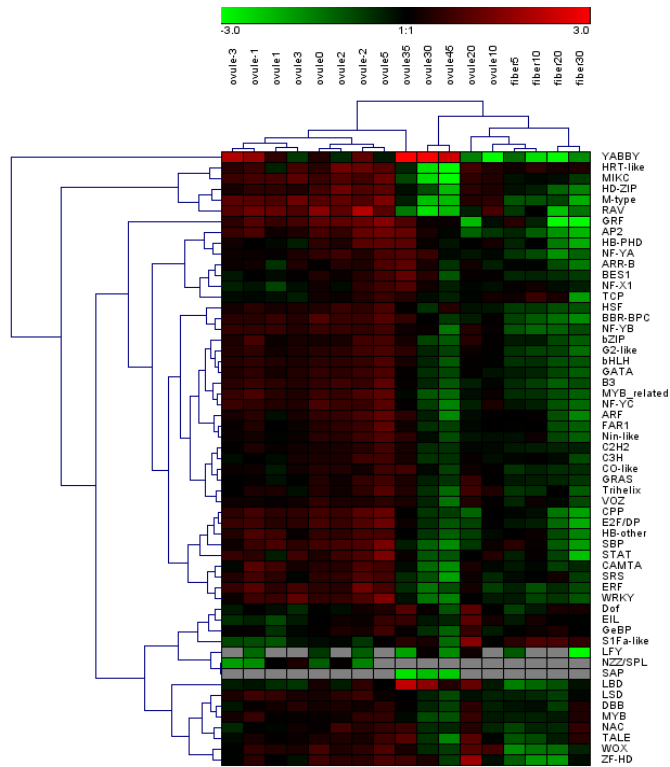

**b**

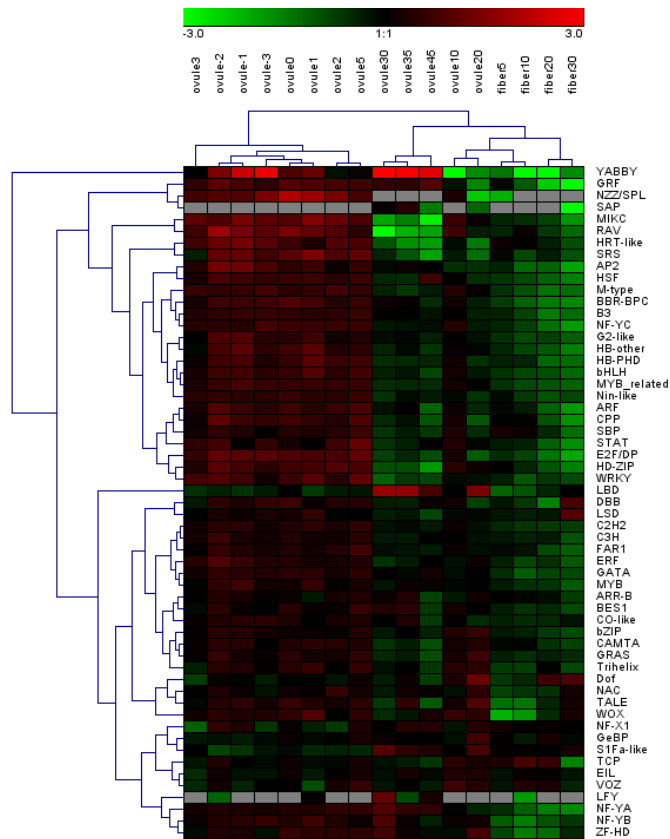

# Supplementary Figure 11

c

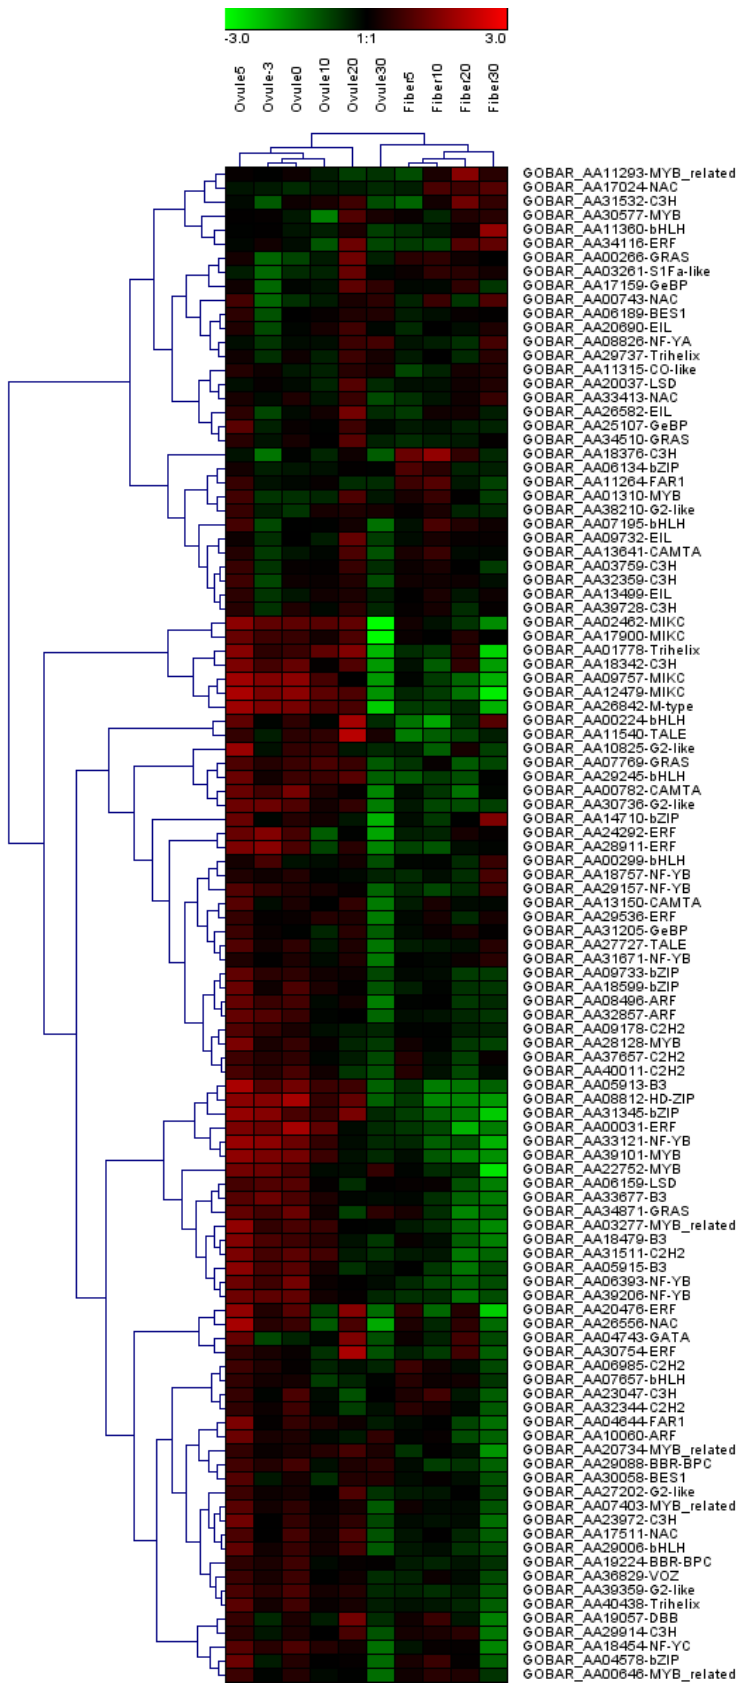

Supplementary Figure 11

d

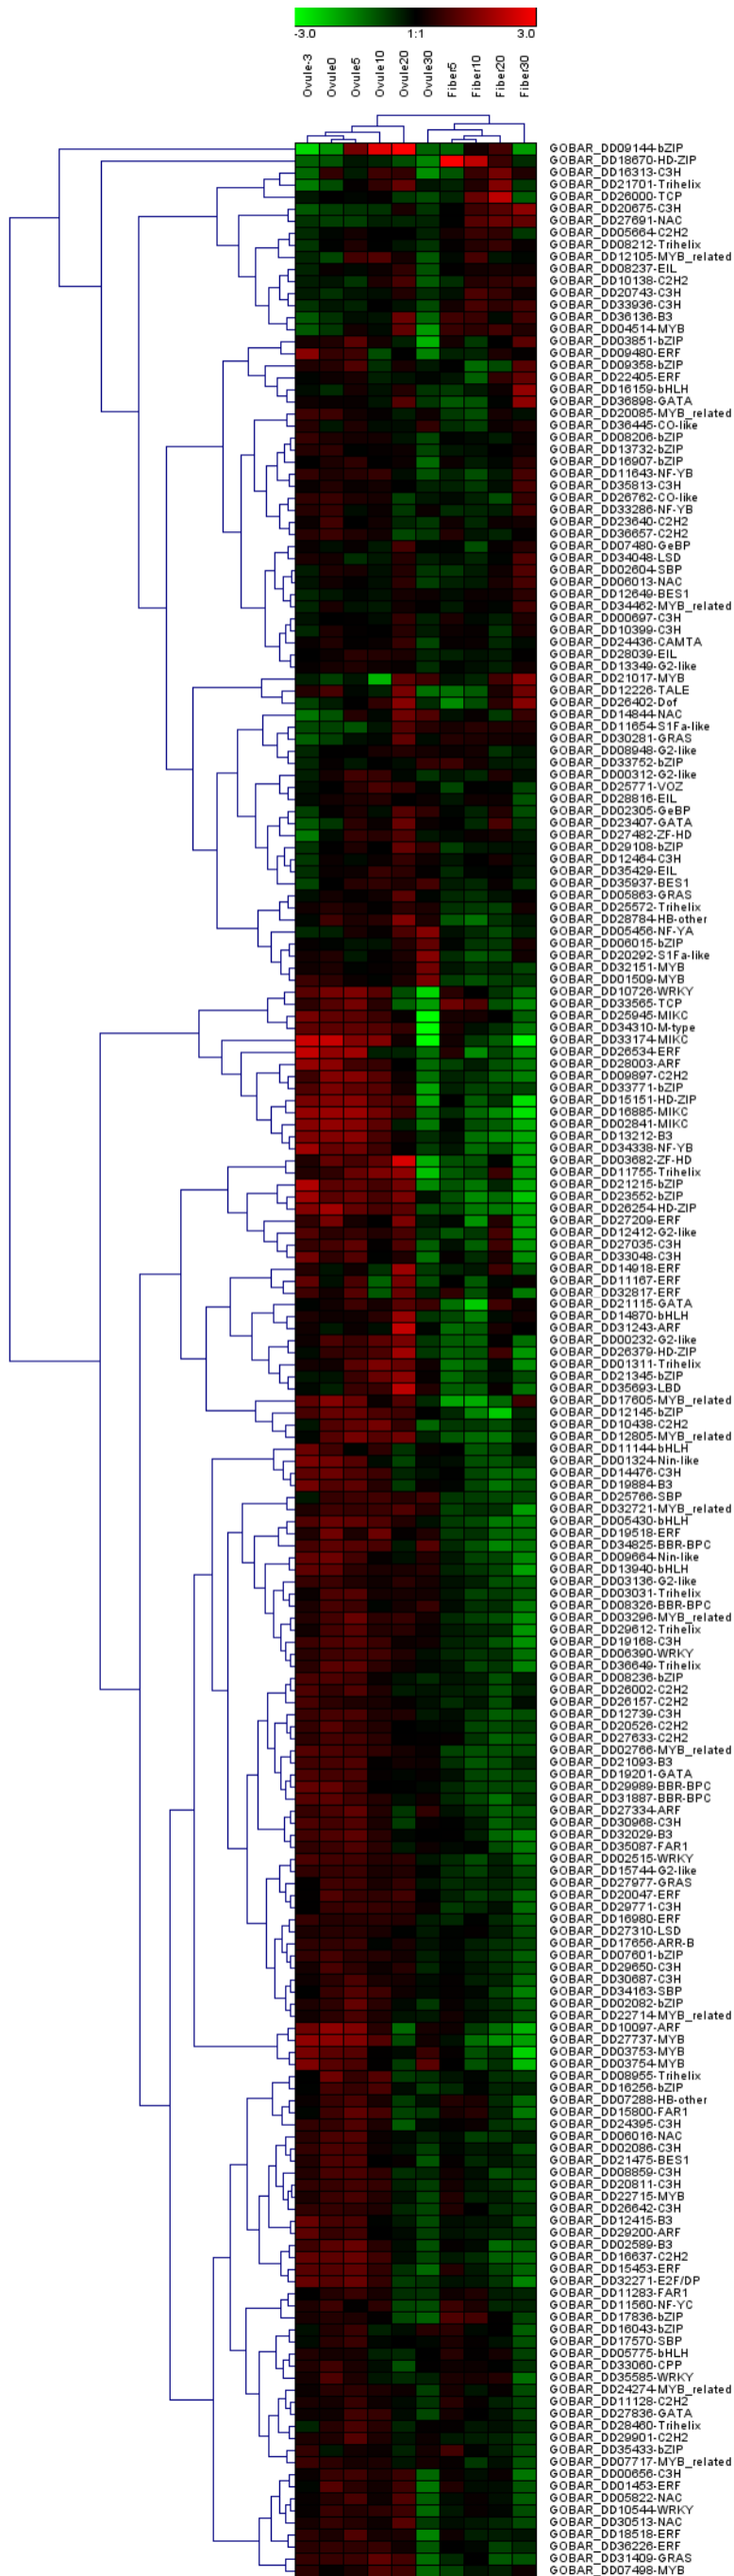

**Supplementary Figure 11. Expression profiles of transcription factor (TF) families of  $A_t$  and  $D_t$  in ovules and fibers at different developmental stages.** (a) Expression profile of TF families in  $A_t$ . (b) Expression profile of TF families in  $D_t$ . (c) Expression profile of highly expressed TF genes (RPKM>10) in  $A_t$ . (d) Expression profile of highly expressed TF genes (RPKM>10) in  $D_t$ . The expression level of each TF family is represented by the average RPKM values of all genes in this family. RPKM values ( $\text{Log}_2$ ) of each family were clustered by complete linkage hierarchical clustering method. Green indicates lower expression, and red indicates higher expression.



## Supplementary Figure 12

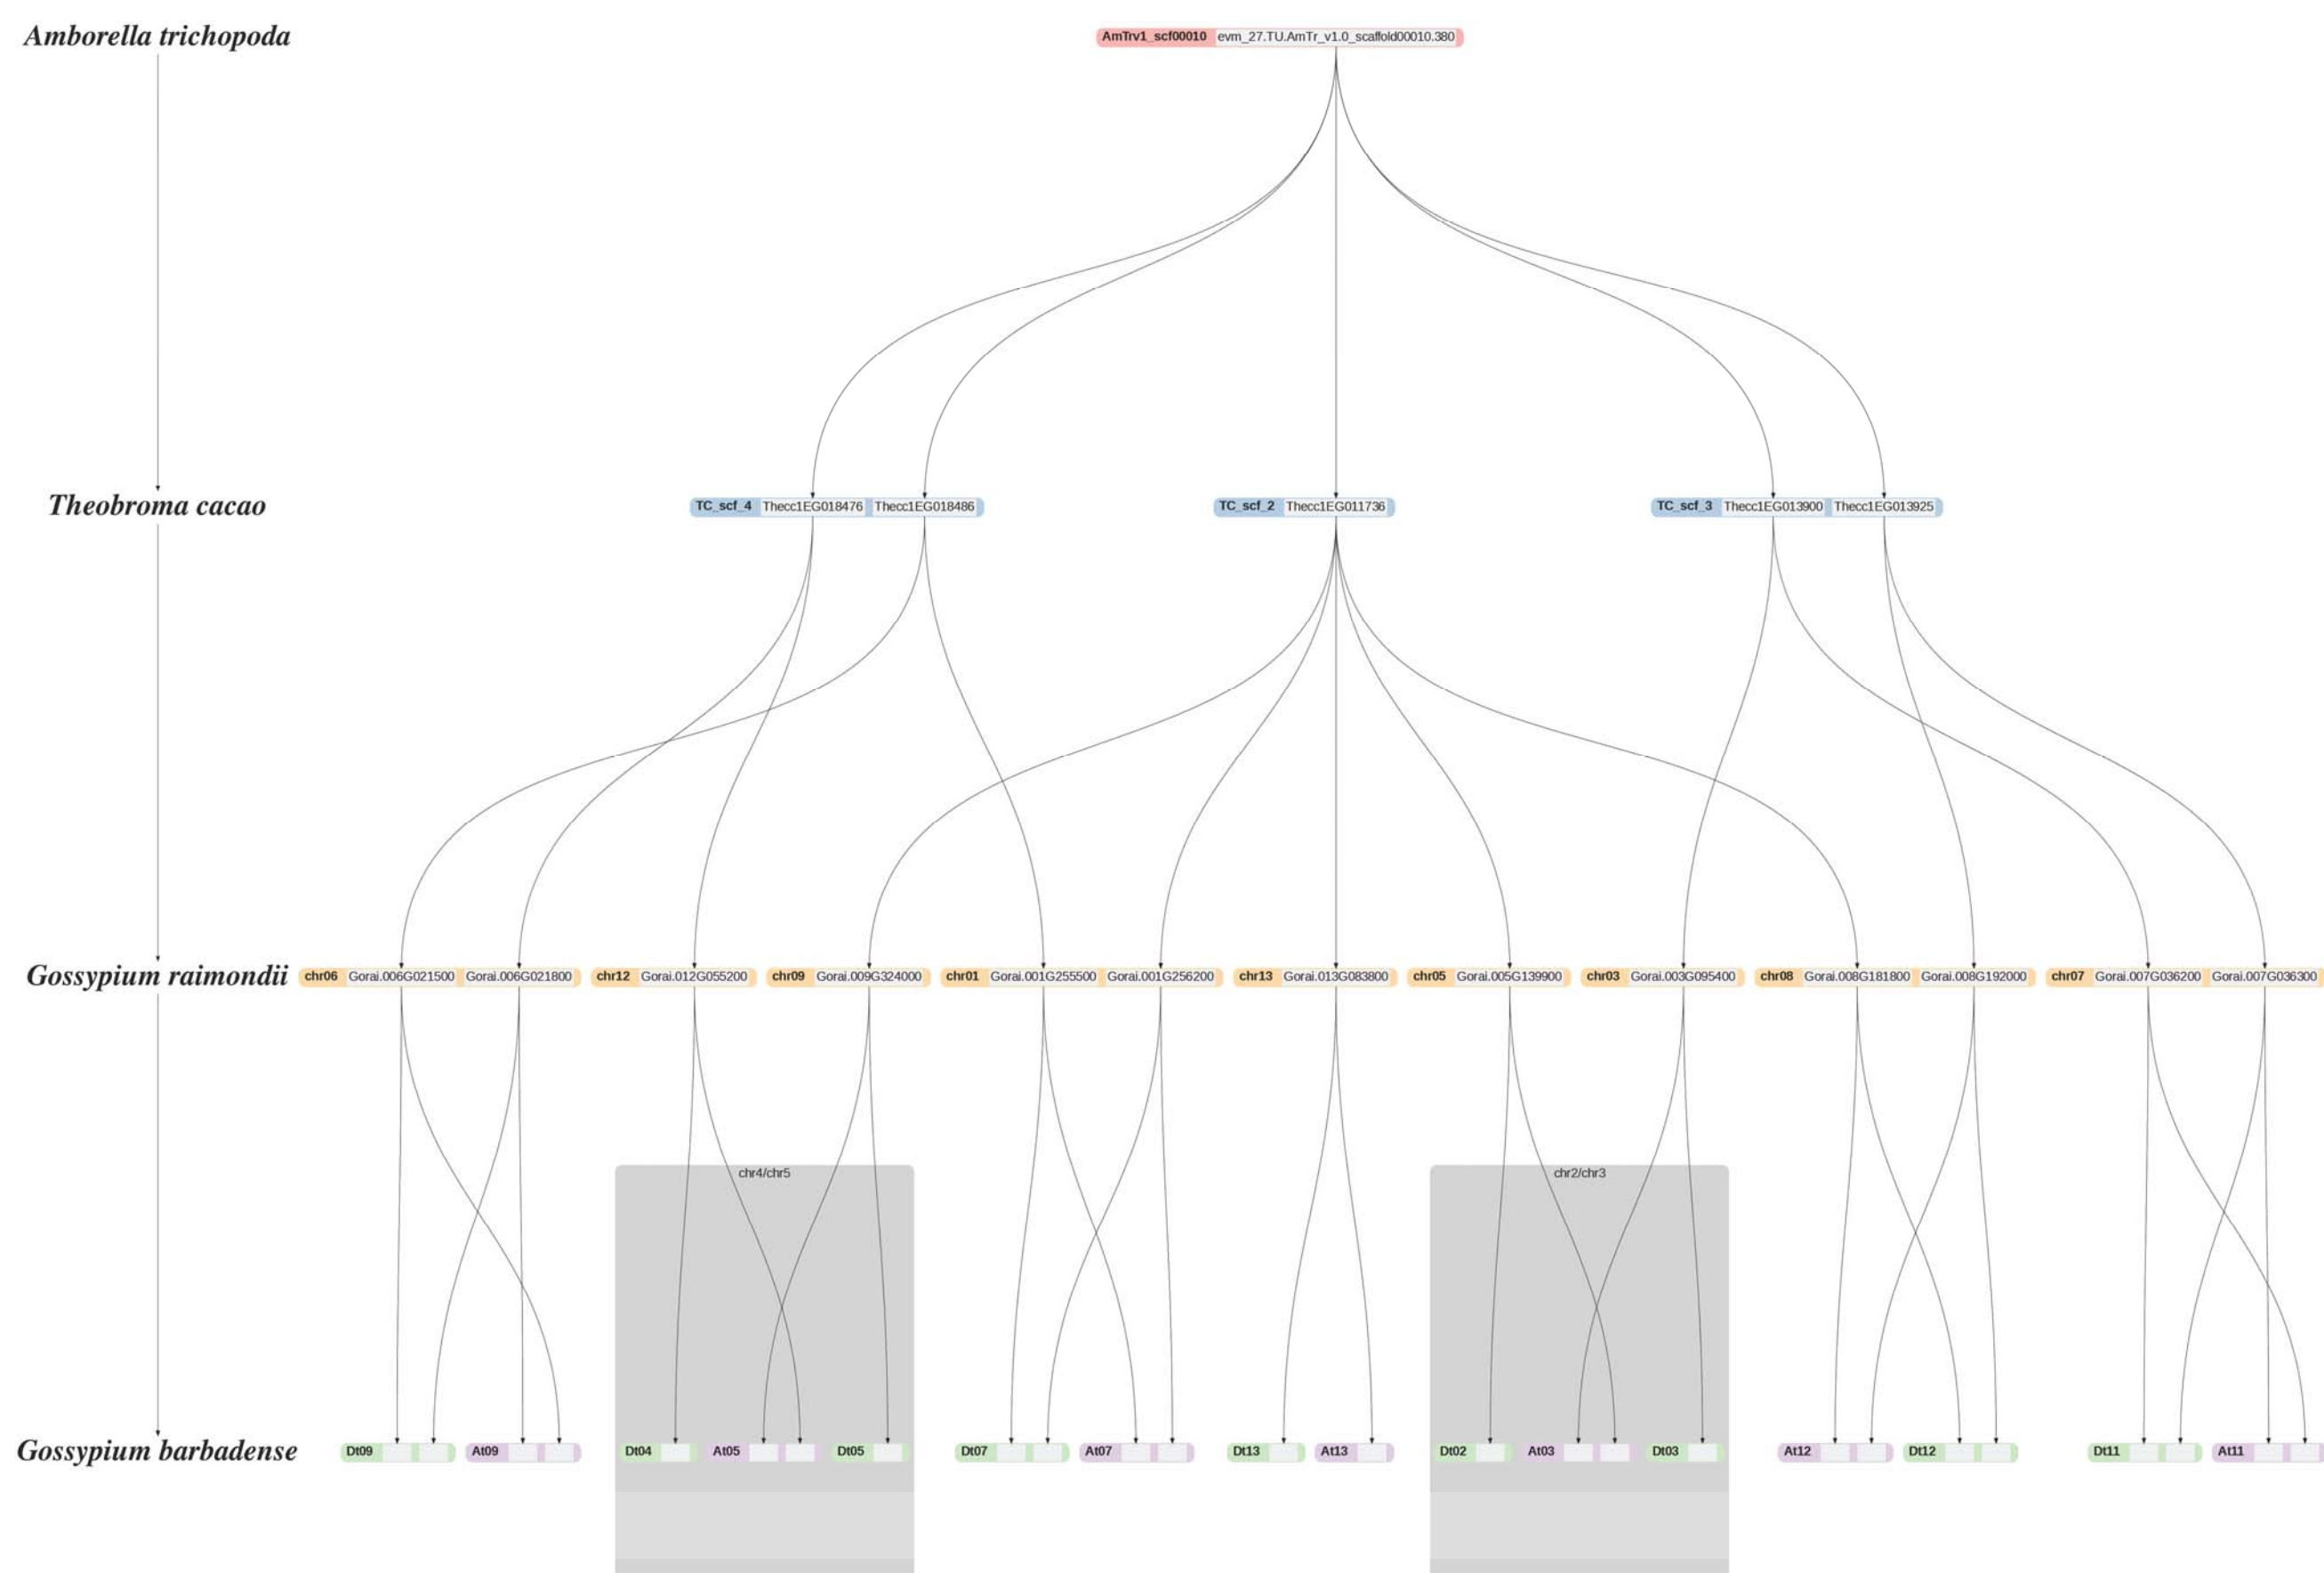

### Supplementary Figure 12. Expansion and subsequent diversification of *PRE* family genes in *Gossypium*.

The gene sets of *Amborella trichopoda*, *Theobroma cacao*, *G. raimondii*, *G. barbadense* were scanned with the well defined *Arabidopsis thaliana* *PRE* sequences (AT5G39860, AT5G15160, AT1G74500, At3g47710, AT3G28857, At1g26945) to distinguish a core *PRE* set in each lineage. The gene ancestry information (<http://www.phytozome.net>) was further used to ascertain the number of *PRE* genes present in each plant. Only one best-predicted homolog was revealed in *Amborella*, and we arbitrary define it as *Amborella PRE1* gene that represents here the most ancestral *PRE* member in angiosperms. Syntenic regions containing *PRE* genes were used to unravel the evolutionary history leading to the expansion and diversification of *Gossypium* *PRE* family. Two intra-subgenome reciprocal translocations (chr02/chr03 and chr04/chr05) carrying *PRE* genes are indicated with grey boxes.

Supplementary Figure 13

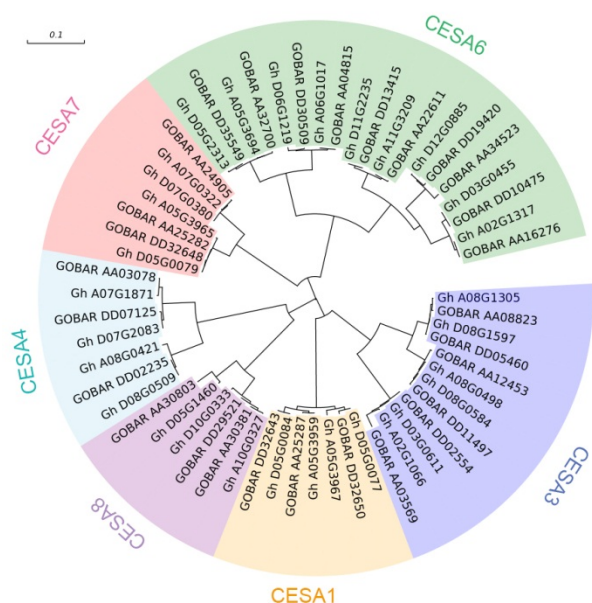

**Supplementary Figure 13. Clustering analysis of *Cesa* genes in *G. barbadense* and *G. hirsutum*.** There are 29 cellulose synthase (*Cesa*) genes *G. barbadense* genome (GOBAR), among which 14 in  $A_t$  and 15 in  $D_t$  subgenome, respectively, compared to 30 in *G. hirsutum* (Gh) with 14 in  $A_t$  and 16 in  $D_t$ . The ORFs were clustered by MAGE5 using maximum likelihood method.

**Supplementary Figure 14**

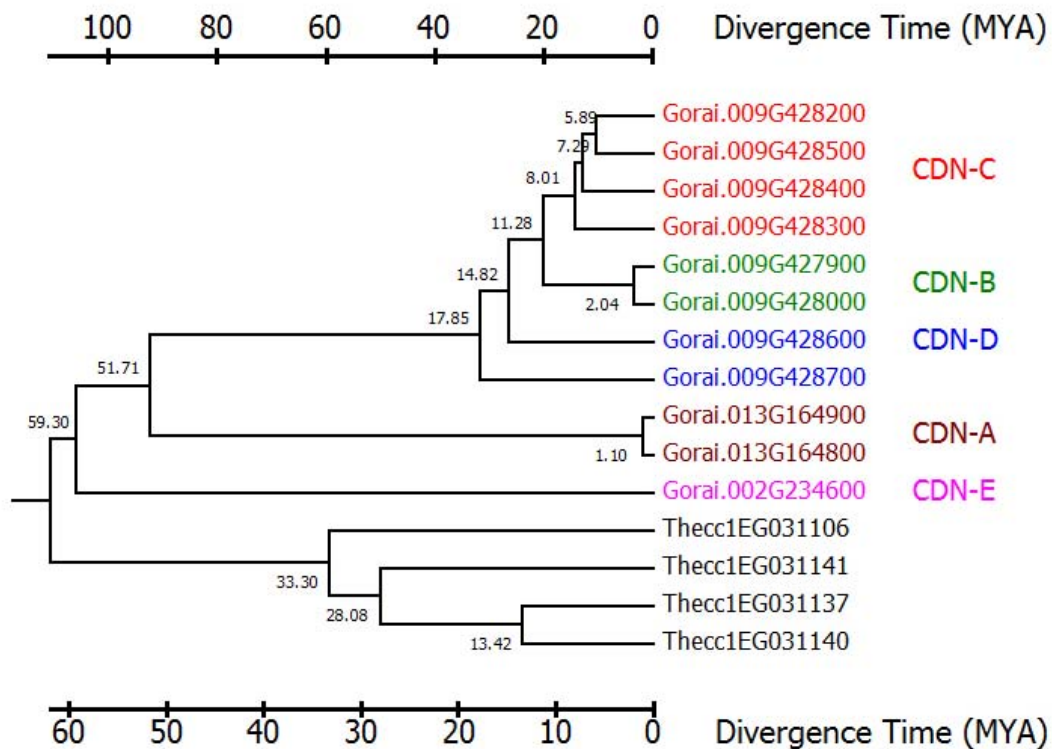

**Supplementary Figure 14. Divergence of CDN genes of *G. raimondii* and *T. cacao*.** CDN ORFs from *G. raimondii* and *T. cacao* genomes were clustered by neighbor joining algorithm and the divergence time was estimated according to the nucleotide substitution rates (upper scale bar), and adjusted according to the estimated divergence time of cotton lineage (~ 60 Mya, lower scale bar) with MEGA software. Numbers at each branch node represent estimated time. See also Figure 1.

**Supplementary Table 1. Grouping results of different sequencing libraries**

| Group          | HiSeq 2000    |        | 454 GS FLX  |        | Overall       |        |
|----------------|---------------|--------|-------------|--------|---------------|--------|
|                | Total bases   | Ratio  | Total bases | Ratio  | Total bases   | Ratio  |
| A <sub>t</sub> | 1,066,173,459 | 44.7%  | 51,641,008  | 49.7%  | 1,117,814,467 | 44.9%  |
| D <sub>t</sub> | 639,865,519   | 26.8%  | 29,981,752  | 28.9%  | 669,847,271   | 26.9%  |
| Both           | 227,649,719   | 9.5%   | 14,542,252  | 14.0%  | 242,191,971   | 9.7%   |
| None           | 452,467,973   | 19.0%  | 7,708,060   | 7.4%   | 460,176,033   | 18.5%  |
| Total          | 2,386,156,670 | 100.0% | 103,873,072 | 100.0% | 2,490,029,742 | 100.0% |

**Supplementary Table 3. Repeats distribution in *G. barbadense* genome**

| Type           | Number of elements |                | Length occupied (bp) |                | Percentage of sequence |                |
|----------------|--------------------|----------------|----------------------|----------------|------------------------|----------------|
|                | A <sub>t</sub>     | D <sub>t</sub> | A <sub>t</sub>       | D <sub>t</sub> | A <sub>t</sub>         | D <sub>t</sub> |
| LINEs:         | 11,626             | 20,267         | 11,861,690           | 10,577,775     | 0.85%                  | 1.36%          |
| LINE1          | 9,256              | 17,542         | 10,198,694           | 9,383,067      | 0.73%                  | 1.21%          |
| LINE2          | 292                | 1,828          | 233,216              | 716,566        | 0.02%                  | 0.09%          |
| L3/CR1         | 2,078              | 433            | 1,429,780            | 347,665        | 0.10%                  | 0.04%          |
| LTR elements   | 390,652            | 186,476        | 384,983,014          | 149,291,347    | 26.60%                 | 19.24%         |
| DNA elements   | 62,344             | 77,768         | 23,907,248           | 32,806,245     | 1.71%                  | 4.23%          |
| Simple repeats | 207,969            | 145,029        | 13,918,742           | 8,700,108      | 1.00%                  | 1.12%          |
| Low complexity | 58,220             | 38,444         | 3,345,799            | 2,140,612      | 0.24%                  | 0.28%          |
| Other repeats  | 947,402            | 818,875        | 485,715,903          | 264,231,571    | 34.83%                 | 34.08%         |

**Supplementary Table 5. *Ks* between genomes/subgenomes of Cotton**

|                                       | Peak <i>Ks</i> | Divergence time (Mya) |
|---------------------------------------|----------------|-----------------------|
| GaA <sub>2</sub> and GrD <sub>5</sub> | 0.041          | 8.1                   |
| GbA <sub>t</sub> and GaA <sub>2</sub> | 0.007          | 1.35                  |
| GbA <sub>t</sub> and GbD <sub>t</sub> | 0.041          | 8.1                   |
| GbA <sub>t</sub> and GhA <sub>t</sub> | 0.005          | 0.96                  |
| GbA <sub>t</sub> and GhD <sub>t</sub> | 0.035          | 6.73                  |
| GbA <sub>t</sub> and GrD <sub>5</sub> | 0.039          | 7.5                   |
| GbD <sub>t</sub> and GhD <sub>t</sub> | 0.005          | 0.96                  |
| GbD <sub>t</sub> and GaA <sub>2</sub> | 0.041          | 8.1                   |
| GbDt and GhAt                         | 0.041          | 8.1                   |
| GbD <sub>t</sub> and GrD <sub>5</sub> | 0.011          | 2.11                  |
| GhA <sub>t</sub> and GaA <sub>2</sub> | 0.006          | 1.15                  |
| GhA <sub>t</sub> and GhD <sub>t</sub> | 0.043          | 8.27                  |
| GhA <sub>t</sub> and GrD <sub>5</sub> | 0.037          | 7.11                  |
| GhD <sub>t</sub> and GaA <sub>2</sub> | 0.037          | 7.11                  |
| GhD <sub>t</sub> and GrD <sub>5</sub> | 0.011          | 2.11                  |

Ga, *G. arboreum*; Gb, *G. barbadense*; Gh, *G. hirsutum*; Gr, *G. raimondii*.

**Supplementary Table 8. LTR retrons in different cotton genomes**

| <b>Cotton</b>                         | <b>Number of LTR-retrons</b> |
|---------------------------------------|------------------------------|
| <i>G. raimondii</i> (D <sub>5</sub> ) | 2,992                        |
| <i>G. arboreum</i> (A <sub>2</sub> )  | 8,620                        |
| <i>G. barbadense</i> A <sub>t</sub>   | 6,014                        |
| <i>G. barbadense</i> D <sub>t</sub>   | 2,422                        |
| <i>G. hirsutum</i> A <sub>t</sub>     | 4,283                        |
| <i>G. hirsutum</i> D <sub>t</sub>     | 2,731                        |
| <i>G. hirsutum</i> Unassigned         | 1,610                        |

**Supplementary Table 9. Summary of predicted pseudogenes in cotton genomes**

| Genome           | DUP   | FRAG   | PSSD  | Total  | Closest parent | Size (Mb) | Identity above 90% |
|------------------|-------|--------|-------|--------|----------------|-----------|--------------------|
| GbA <sub>t</sub> | 6,566 | 14,201 | 3,636 | 24,403 | 10,511         | 20.5      | 4,353              |
| GbD <sub>t</sub> | 5,364 | 12,571 | 3,373 | 21,307 | 9,391          | 15.7      | 3,301              |
| Gr               | 3,346 | 9,023  | 3,500 | 15,869 | 5,429          | 13.3      | 1,942              |

DUP, duplicated; FRAG, fragmented; PSSD, processed. See also **Supplementary Figure 8**.  
Gb, *G. barbadense*; Gr, *G. raimondii*.



**Supplementary Table 13. GO enrichment analysis of highly expressed genes in fiber**

| GO-ID      | Term                                               | Category | FDR         | P-Value  | #Test | #Ref | Over/Under |
|------------|----------------------------------------------------|----------|-------------|----------|-------|------|------------|
| GO:0031224 | intrinsic to membrane                              | C        | 3.37E-13    | 1.34E-16 | 133   | 1651 | over       |
| GO:0016021 | integral to membrane                               | C        | 3.37E-13    | 1.49E-16 | 128   | 1560 | over       |
| GO:0016020 | membrane                                           | C        | 3.37E-13    | 1.98E-16 | 230   | 3653 | over       |
| GO:0044425 | membrane part                                      | C        | 1.96E-11    | 1.53E-14 | 146   | 2018 | over       |
| GO:0071944 | cell periphery                                     | C        | 2.38E-04    | 2.33E-07 | 62    | 817  | over       |
| GO:0006810 | transport                                          | P        | 6.77E-04    | 9.06E-07 | 121   | 2089 | over       |
| GO:0051234 | establishment of localization                      | P        | 6.77E-04    | 9.27E-07 | 121   | 2090 | over       |
| GO:0051179 | localization                                       | P        | 7.58E-04    | 1.19E-06 | 122   | 2123 | over       |
| GO:0007018 | microtubule-based movement                         | P        | 9.42E-04    | 1.70E-06 | 16    | 94   | over       |
| GO:0005975 | carbohydrate metabolic process                     | P        | 9.42E-04    | 1.86E-06 | 62    | 873  | over       |
| GO:0005856 | cytoskeleton                                       | C        | 9.42E-04    | 2.03E-06 | 24    | 203  | over       |
| GO:0005794 | Golgi apparatus                                    | C        | 0.001303656 | 3.06E-06 | 20    | 151  | over       |
| GO:0005874 | microtubule                                        | C        | 0.001662286 | 4.88E-06 | 16    | 103  | over       |
| GO:0051258 | protein polymerization                             | P        | 0.001671532 | 5.23E-06 | 11    | 47   | over       |
| GO:0044430 | cytoskeletal part                                  | C        | 0.001705131 | 5.67E-06 | 20    | 158  | over       |
| GO:0007017 | microtubule-based process                          | P        | 0.001928969 | 6.79E-06 | 17    | 119  | over       |
| GO:0006825 | copper ion transport                               | P        | 0.002578507 | 1.03E-05 | 7     | 16   | over       |
| GO:0032561 | guanyl ribonucleotide binding                      | F        | 0.002578507 | 1.06E-05 | 28    | 290  | over       |
| GO:0005525 | GTP binding                                        | F        | 0.002578507 | 1.06E-05 | 28    | 290  | over       |
| GO:0019001 | guanyl nucleotide binding                          | F        | 0.002765055 | 1.19E-05 | 28    | 292  | over       |
| GO:0004427 | inorganic diphosphatase activity                   | F        | 0.003139539 | 1.41E-05 | 7     | 17   | over       |
| GO:0005886 | plasma membrane                                    | C        | 0.004749284 | 2.23E-05 | 45    | 612  | over       |
| GO:0006461 | protein complex assembly                           | P        | 0.004853524 | 2.47E-05 | 16    | 119  | over       |
| GO:0070271 | protein complex biogenesis                         | P        | 0.004853524 | 2.47E-05 | 16    | 119  | over       |
| GO:0016757 | transferase activity, transferring glycosyl groups | F        | 0.007606364 | 4.15E-05 | 40    | 533  | over       |
| GO:0043623 | cellular protein complex assembly                  | P        | 0.007606364 | 4.17E-05 | 15    | 111  | over       |
| GO:0005783 | endoplasmic reticulum                              | C        | 0.008778652 | 4.98E-05 | 19    | 171  | over       |
| GO:0005887 | integral to plasma membrane                        | C        | 0.011501813 | 6.75E-05 | 6     | 15   | over       |
| GO:0071822 | protein complex subunit organization               | P        | 0.013632918 | 8.27E-05 | 16    | 133  | over       |

|            |                                                 |   |             |          |     |      |      |
|------------|-------------------------------------------------|---|-------------|----------|-----|------|------|
| GO:0031226 | intrinsic to plasma membrane                    | C | 0.018746283 | 1.17E-04 | 8   | 35   | over |
| GO:0035556 | intracellular signal transduction               | P | 0.020884908 | 1.35E-04 | 25  | 286  | over |
| GO:0015630 | microtubule cytoskeleton                        | C | 0.020964037 | 1.42E-04 | 16  | 140  | over |
| GO:0033036 | macromolecule localization                      | P | 0.020964037 | 1.44E-04 | 40  | 567  | over |
| GO:0035434 | copper ion transmembrane transport              | P | 0.024252644 | 1.76E-04 | 5   | 11   | over |
| GO:0005375 | copper ion transmembrane transporter activity   | F | 0.024252644 | 1.76E-04 | 5   | 11   | over |
| GO:0034613 | cellular protein localization                   | P | 0.030548226 | 2.27E-04 | 24  | 279  | over |
| GO:0003924 | GTPase activity                                 | F | 0.035015941 | 2.67E-04 | 13  | 104  | over |
| GO:0070727 | cellular macromolecule localization             | P | 0.036967856 | 2.89E-04 | 24  | 284  | over |
| GO:0000139 | Golgi membrane                                  | C | 0.043524332 | 3.49E-04 | 8   | 42   | over |
| GO:0003779 | actin binding                                   | F | 0.044599896 | 3.76E-04 | 11  | 80   | over |
| GO:0045184 | establishment of protein localization           | P | 0.044599896 | 3.84E-04 | 31  | 420  | over |
| GO:0015031 | protein transport                               | P | 0.044599896 | 3.84E-04 | 31  | 420  | over |
| GO:0009678 | hydrogen-translocating pyrophosphatase activity | F | 0.048409828 | 4.26E-04 | 4   | 7    | over |
| GO:0031224 | intrinsic to membrane                           | C | 6.72E-12    | 2.76E-15 | 114 | 1320 | over |
| GO:0016021 | integral to membrane                            | C | 6.72E-12    | 2.85E-15 | 110 | 1250 | over |
| GO:0016020 | membrane                                        | C | 1.64E-11    | 1.05E-14 | 199 | 3020 | over |
| GO:0044425 | membrane part                                   | C | 9.96E-11    | 8.45E-14 | 127 | 1634 | over |
| GO:0008565 | protein transporter activity                    | F | 9.07E-04    | 9.62E-07 | 15  | 75   | over |
| GO:0034613 | cellular protein localization                   | P | 0.002849246 | 3.62E-06 | 25  | 217  | over |
| GO:0070727 | cellular macromolecule localization             | P | 0.003043904 | 4.52E-06 | 25  | 220  | over |
| GO:0035251 | UDP-glucosyltransferase activity                | F | 0.004649592 | 7.89E-06 | 15  | 91   | over |
| GO:0016760 | cellulose synthase (UDP-forming) activity       | F | 0.008270125 | 1.58E-05 | 8   | 24   | over |
| GO:0071554 | cell wall organization or biogenesis            | P | 0.008644858 | 1.85E-05 | 23  | 210  | over |
| GO:0016759 | cellulose synthase activity                     | F | 0.008644858 | 2.02E-05 | 8   | 25   | over |
| GO:0006886 | intracellular protein transport                 | P | 0.01330291  | 3.46E-05 | 22  | 204  | over |
| GO:0046527 | glucosyltransferase activity                    | F | 0.01330291  | 3.94E-05 | 15  | 106  | over |
| GO:0005856 | cytoskeleton                                    | C | 0.01330291  | 3.99E-05 | 20  | 176  | over |
| GO:0044430 | cytoskeletal part                               | C | 0.01330291  | 4.33E-05 | 17  | 134  | over |
| GO:0005874 | microtubule                                     | C | 0.01330291  | 4.51E-05 | 13  | 82   | over |
| GO:0070882 | cellular cell wall organization or biogenesis   | P | 0.015194156 | 5.57E-05 | 17  | 137  | over |

|            |                                                        |   |             |          |    |      |      |
|------------|--------------------------------------------------------|---|-------------|----------|----|------|------|
| GO:0051641 | cellular localization                                  | P | 0.015194156 | 5.80E-05 | 29 | 326  | over |
| GO:0005975 | carbohydrate metabolic process                         | P | 0.024480801 | 9.86E-05 | 54 | 806  | over |
| GO:0004672 | protein kinase activity                                | F | 0.024679745 | 1.05E-04 | 74 | 1218 | over |
| GO:0007018 | microtubule-based movement                             | P | 0.025269752 | 1.14E-04 | 12 | 78   | over |
| GO:0007047 | cellular cell wall organization                        | P | 0.025269752 | 1.18E-04 | 15 | 118  | over |
| GO:0045229 | external encapsulating structure organization          | P | 0.028610906 | 1.40E-04 | 15 | 120  | over |
| GO:0030244 | cellulose biosynthetic process                         | P | 0.029394554 | 1.52E-04 | 8  | 35   | over |
| GO:0046907 | intracellular transport                                | P | 0.029394554 | 1.56E-04 | 24 | 261  | over |
| GO:0008104 | protein localization                                   | P | 0.033314441 | 1.84E-04 | 30 | 368  | over |
| GO:0016773 | phosphotransferase activity, alcohol group as acceptor | F | 0.03425929  | 1.96E-04 | 80 | 1373 | over |
| GO:0030243 | cellulose metabolic process                            | P | 0.035677418 | 2.12E-04 | 8  | 37   | over |
| GO:0051649 | establishment of localization in cell                  | P | 0.045821793 | 2.82E-04 | 26 | 307  | over |

C: Cellular Component; P: Biological Process; F: Molecular Function

GO enrichment analysis was performed using Blast2go software.

**Supplementary Table 14. GO enrichment analysis of highly expressed genes in ovule**

| <b>GO-ID</b> | <b>Term</b>                                                                         | <b>Category</b> | <b>FDR</b>  | <b>P-Value</b> | <b>#Test</b> | <b>#Ref</b> | <b>Over/Under</b> |
|--------------|-------------------------------------------------------------------------------------|-----------------|-------------|----------------|--------------|-------------|-------------------|
| GO:0019222   | regulation of metabolic process                                                     | P               | 1.25E-05    | 2.55E-09       | 77           | 1515        | over              |
| GO:0005811   | lipid particle                                                                      | C               | 1.25E-05    | 4.87E-09       | 6            | 2           | over              |
| GO:0003677   | DNA binding                                                                         | F               | 5.34E-05    | 3.14E-08       | 103          | 2414        | over              |
| GO:0005634   | nucleus                                                                             | C               | 1.39E-04    | 1.09E-07       | 89           | 2032        | over              |
| GO:0012511   | monolayer-surrounded lipid storage body                                             | C               | 1.58E-04    | 1.54E-07       | 5            | 2           | over              |
| GO:0060255   | regulation of macromolecule metabolic process                                       | P               | 2.23E-04    | 2.62E-07       | 62           | 1253        | over              |
| GO:0032774   | RNA biosynthetic process                                                            | P               | 2.36E-04    | 3.24E-07       | 68           | 1438        | over              |
| GO:0006355   | regulation of transcription, DNA-dependent                                          | P               | 2.55E-04    | 4.03E-07       | 57           | 1125        | over              |
| GO:0051252   | regulation of RNA metabolic process                                                 | P               | 2.55E-04    | 4.49E-07       | 57           | 1129        | over              |
| GO:0031326   | regulation of cellular biosynthetic process                                         | P               | 2.96E-04    | 5.89E-07       | 58           | 1168        | over              |
| GO:0009889   | regulation of biosynthetic process                                                  | P               | 2.96E-04    | 6.38E-07       | 58           | 1171        | over              |
| GO:0010556   | regulation of macromolecule biosynthetic process                                    | P               | 3.34E-04    | 8.49E-07       | 57           | 1153        | over              |
| GO:2000112   | regulation of cellular macromolecule biosynthetic process                           | P               | 3.34E-04    | 8.49E-07       | 57           | 1153        | over              |
| GO:0065007   | biological regulation                                                               | P               | 3.74E-04    | 1.09E-06       | 100          | 2506        | over              |
| GO:0080090   | regulation of primary metabolic process                                             | P               | 3.74E-04    | 1.10E-06       | 62           | 1310        | over              |
| GO:0031323   | regulation of cellular metabolic process                                            | P               | 3.95E-04    | 1.24E-06       | 62           | 1315        | over              |
| GO:0006351   | transcription, DNA-dependent                                                        | P               | 3.98E-04    | 1.32E-06       | 66           | 1438        | over              |
| GO:0010468   | regulation of gene expression                                                       | P               | 4.86E-04    | 1.78E-06       | 57           | 1182        | over              |
| GO:0051171   | regulation of nitrogen compound metabolic process                                   | P               | 4.86E-04    | 1.80E-06       | 58           | 1212        | over              |
| GO:0019219   | regulation of nucleobase, nucleoside, nucleotide and nucleic acid metabolic process | P               | 8.18E-04    | 3.20E-06       | 57           | 1206        | over              |
| GO:0050789   | regulation of biological process                                                    | P               | 0.001199459 | 4.93E-06       | 94           | 2397        | over              |
| GO:0045735   | nutrient reservoir activity                                                         | F               | 0.001590129 | 6.84E-06       | 7            | 24          | over              |
| GO:0016602   | CCAAT-binding factor complex                                                        | C               | 0.00821046  | 3.69E-05       | 4            | 5           | over              |
| GO:0043086   | negative regulation of catalytic activity                                           | P               | 0.008901959 | 4.18E-05       | 14           | 150         | over              |
| GO:0006261   | DNA-dependent DNA replication                                                       | P               | 0.008919009 | 4.36E-05       | 6            | 22          | over              |

|            |                                                             |   |             |          |     |      |      |
|------------|-------------------------------------------------------------|---|-------------|----------|-----|------|------|
| GO:0000079 | regulation of cyclin-dependent protein kinase activity      | P | 0.009597489 | 5.33E-05 | 3   | 1    | over |
| GO:0003896 | DNA primase activity                                        | F | 0.009597489 | 5.33E-05 | 3   | 1    | over |
| GO:0071900 | regulation of protein serine/threonine kinase activity      | P | 0.009597489 | 5.33E-05 | 3   | 1    | over |
| GO:0044092 | negative regulation of molecular function                   | P | 0.009597489 | 5.44E-05 | 14  | 154  | over |
| GO:0019901 | protein kinase binding                                      | F | 0.010292779 | 6.04E-05 | 4   | 6    | over |
| GO:0004857 | enzyme inhibitor activity                                   | F | 0.012613196 | 7.65E-05 | 13  | 139  | over |
| GO:0016070 | RNA metabolic process                                       | P | 0.014231081 | 8.91E-05 | 69  | 1749 | over |
| GO:0003700 | sequence-specific DNA binding transcription factor activity | F | 0.01983475  | 1.32E-04 | 36  | 741  | over |
| GO:0001071 | nucleic acid binding transcription factor activity          | F | 0.01983475  | 1.32E-04 | 36  | 741  | over |
| GO:0019900 | kinase binding                                              | F | 0.020017571 | 1.37E-04 | 4   | 8    | over |
| GO:0004312 | fatty acid synthase activity                                | F | 0.02559089  | 1.80E-04 | 5   | 18   | over |
| GO:0050794 | regulation of cellular process                              | P | 0.029488335 | 2.13E-04 | 79  | 2140 | over |
| GO:0007049 | cell cycle                                                  | P | 0.030178312 | 2.24E-04 | 11  | 115  | over |
| GO:0050790 | regulation of catalytic activity                            | P | 0.033757873 | 2.57E-04 | 19  | 299  | over |
| GO:0043231 | intracellular membrane-bounded organelle                    | C | 0.03470739  | 2.72E-04 | 125 | 3780 | over |
| GO:0003677 | DNA binding                                                 | F | 1.41E-04    | 2.98E-08 | 72  | 1512 | over |

C: Cellular Component; P: Biological Process; F: Molecular Function

GO enrichment analysis was performed using Blast2go software.

**Supplementary Table 16. Expression variance of genes in different tissues of *G. barbadense***

| Samples      | Total biased genes | $A_t > D_t$ | $A_t = D_t$ | $A_t < D_t$ | $A_t/D_t > 1.5$ | $D_t/A_t > 1.5$ |
|--------------|--------------------|-------------|-------------|-------------|-----------------|-----------------|
| Ovule 0 DPA  | 14,671             | 7,374       | 53          | 7,244       | 3,471           | 3,436           |
| Ovule 5DPA   | 15,269             | 7,549       | 100         | 7,620       | 3,698           | 3,739           |
| Ovule 30 DPA | 13,736             | 6,831       | 91          | 6,814       | 3,284           | 3,321           |
| Fiber 5DPA   | 13,866             | 6,967       | 27          | 6,892       | 3,120           | 3,209           |
| Fiber 10DPA  | 13,895             | 6,901       | 62          | 6,932       | 3,369           | 3,415           |
| Fiber 20DPA  | 12,945             | 6,494       | 32          | 6,419       | 3,261           | 3,278           |
| Fiber 30DPA  | 12,065             | 6,014       | 16          | 6,035       | 2,980           | 3,081           |
| Root         | 13,021             | 6,480       | 155         | 6,386       | 4,164           | 4,075           |
| Stem         | 15,073             | 7,591       | 67          | 7,415       | 3,821           | 3,821           |
| Bud          | 15,030             | 7,528       | 69          | 7,433       | 3,995           | 4,157           |
| Young leaf   | 13,733             | 6,945       | 74          | 6,754       | 3,715           | 3,666           |
| Old leaf     | 13,973             | 6,954       | 89          | 6,930       | 4,020           | 4,022           |

Genes with RPKM $\geq$ 1 are included in this assay. Those with absolute value of ratio (RPKM of  $A_t$  to  $D_t$ )  $>1.5$  are defined  $A_t$  biased and vice versa.

**Supplementary Table 17. Transcription factor genes identified in A<sub>1</sub>/D<sub>1</sub> of *G. barbadense* genome**

| Family                 | Numbers<br>in A <sub>1</sub> | Average RPKM |          | Numbers<br>in D <sub>1</sub> | Average RPKM |          | Gr  |
|------------------------|------------------------------|--------------|----------|------------------------------|--------------|----------|-----|
|                        |                              | Ovule        | Fiber    |                              | Ovule        | Fiber    |     |
| AP2                    | 42                           | 300.03       | 86.70    | 28                           | 422.15       | 140.45   | 32  |
| ARF                    | 30                           | 519.64       | 298.93   | 32                           | 930.07       | 436.98   | 36  |
| ARR-B                  | 20                           | 78.87        | 46.08    | 24                           | 148.94       | 119.26   | 20  |
| B3                     | 80                           | 779.27       | 344.67   | 72                           | 1,074.20     | 442.03   | 79  |
| BBR-BPC                | 7                            | 201.70       | 65.09    | 7                            | 371.72       | 118.70   | 8   |
| BES1                   | 11                           | 226.64       | 132.52   | 13                           | 327.97       | 191.88   | 11  |
| bHLH                   | 210                          | 2,042.39     | 971.79   | 196                          | 2,762.32     | 1,152.82 | 225 |
| bZIP                   | 101                          | 1,837.77     | 1,003.32 | 101                          | 2,664.29     | 1,579.77 | 115 |
| C2H2                   | 156                          | 1,221.29     | 855.92   | 157                          | 1,930.99     | 1,059.42 | 157 |
| C3H                    | 68                           | 1,064.62     | 832.36   | 71                           | 1,953.71     | 1,233.25 | 72  |
| CAMTA                  | 9                            | 187.75       | 117.74   | 9                            | 156.89       | 108.52   | 11  |
| CO-like                | 17                           | 123.54       | 74.28    | 18                           | 231.51       | 155.86   | 21  |
| CPP                    | 17                           | 176.92       | 81.81    | 15                           | 186.69       | 99.71    | 11  |
| DBB                    | 15                           | 109.57       | 92.90    | 12                           | 51.90        | 40.72    | 14  |
| Dof                    | 54                           | 284.13       | 245.78   | 56                           | 358.94       | 416.97   | 60  |
| E2F/DP                 | 12                           | 141.48       | 58.86    | 16                           | 159.37       | 50.76    | 10  |
| EIL                    | 8                            | 278.20       | 258.58   | 8                            | 357.52       | 331.02   | 10  |
| ERF                    | 217                          | 2,335.71     | 1,103.18 | 215                          | 2,704.12     | 1,395.71 | 225 |
| FAR1                   | 34                           | 315.59       | 198.45   | 33                           | 441.28       | 263.91   | 35  |
| G2-like                | 75                           | 766.62       | 335.86   | 72                           | 951.03       | 426.92   | 71  |
| GATA                   | 39                           | 527.98       | 278.60   | 41                           | 890.79       | 410.87   | 46  |
| GeBP                   | 8                            | 298.87       | 316.35   | 6                            | 91.32        | 88.90    | 8   |
| GRAS                   | 86                           | 734.52       | 479.88   | 82                           | 930.47       | 591.38   | 81  |
| GRF                    | 15                           | 329.02       | 115.48   | 17                           | 545.81       | 151.28   | 18  |
| HB-other               | 19                           | 187.95       | 112.04   | 17                           | 413.93       | 164.58   | 14  |
| HB-PHD                 | 1                            | 9.57         | 4.33     | 3                            | 52.68        | 23.85    | 4   |
| HD-ZIP                 | 76                           | 1,421.94     | 616.47   | 75                           | 2,035.10     | 948.45   | 80  |
| HRT-like               | 4                            | 24.85        | 23.01    | 3                            | 23.34        | 14.82    | 1   |
| HSF                    | 34                           | 276.36       | 126.16   | 33                           | 414.32       | 151.78   | 39  |
| LBD                    | 64                           | 397.41       | 140.46   | 63                           | 374.48       | 174.99   | 67  |
| LFY                    | 1                            | 0.14         | 0.06     | 2                            | 0.36         | 0.06     | 1   |
| LSD                    | 4                            | 102.49       | 66.97    | 5                            | 183.47       | 197.21   | 6   |
| MIKC                   | 24                           | 1,591.80     | 934.08   | 25                           | 3,311.49     | 1,143.03 | 50  |
| M-type                 | 51                           | 762.25       | 212.81   | 73                           | 466.68       | 172.12   | 78  |
| MYB                    | 204                          | 1,685.91     | 1,385.33 | 161                          | 2,990.73     | 1,642.56 | 235 |
| MYB <sub>related</sub> | 118                          | 1,644.10     | 735.07   | 128                          | 2,194.15     | 917.72   | 71  |
| NAC                    | 151                          | 865.16       | 684.96   | 147                          | 1,385.92     | 937.15   | 153 |
| NF-X1                  | 2                            | 18.08        | 16.33    | 1                            | 8.59         | 8.86     | 2   |
| NF-YA                  | 18                           | 180.35       | 66.47    | 17                           | 218.86       | 74.54    | 15  |

|           |     |        |        |     |          |        |     |
|-----------|-----|--------|--------|-----|----------|--------|-----|
| NF-YB     | 28  | 725.58 | 260.11 | 19  | 452.28   | 171.39 | 24  |
| NF-YC     | 13  | 310.51 | 153.75 | 10  | 267.13   | 101.76 | 14  |
| Nin-like  | 18  | 96.85  | 61.88  | 19  | 207.15   | 111.12 | 20  |
| NZZ/SPL   | 1   | 0.24   | 0.00   | 1   | 3.47     | 0.12   | 1   |
| RAV       | 8   | 38.57  | 11.77  | 8   | 80.73    | 35.66  | 9   |
| S1Fa-like | 1   | 68.90  | 115.14 | 3   | 206.53   | 211.87 | 4   |
| SAP       | 4   | 0.03   | 0.00   | 4   | 0.17     | 0.01   | 2   |
| SBP       | 28  | 319.14 | 194.38 | 26  | 306.97   | 233.28 | 30  |
| SRS       | 13  | 32.33  | 25.14  | 12  | 35.92    | 17.44  | 13  |
| STAT      | 1   | 5.22   | 2.54   | 1   | 10.89    | 4.92   | 1   |
| TALE      | 34  | 334.75 | 223.20 | 29  | 320.15   | 175.86 | 44  |
| TCP       | 31  | 255.34 | 253.40 | 36  | 513.88   | 630.43 | 38  |
| Trihelix  | 51  | 833.42 | 486.85 | 51  | 1,138.28 | 654.79 | 51  |
| VOZ       | 2   | 72.93  | 54.06  | 2   | 29.38    | 29.16  | 3   |
| WOX       | 20  | 75.59  | 25.49  | 15  | 80.37    | 38.14  | 20  |
| WRKY      | 110 | 896.36 | 419.20 | 108 | 1,612.38 | 746.59 | 119 |
| YABBY     | 13  | 80.85  | 6.56   | 11  | 125.14   | 7.34   | 12  |
| ZF-HD     | 24  | 342.09 | 116.07 | 25  | 796.78   | 320.67 | 23  |

---



**Supplementary Table 18. The (+)- $\delta$ -cadinene synthase (CDN) family genes in cotton genomes**

| Gene ID | <i>G. arboreum</i> | <i>G. raimondii</i> | <i>G. hirsutum</i> |                | <i>G. barbadense</i> |                |
|---------|--------------------|---------------------|--------------------|----------------|----------------------|----------------|
|         |                    |                     | A <sub>t</sub>     | D <sub>t</sub> | A <sub>t</sub>       | D <sub>t</sub> |
| CDN-A   | 3                  | 2                   | 1                  | 1              | 1                    | 1              |
| CDN-B   | 3                  | 2                   | 3                  | -              | 2                    | 3              |
| CDN-C   | 6                  | 5                   | 2                  | 3              | 3                    | 5              |
| CDN-D   | -                  | 1                   | -                  | 1              | 1                    | 1              |
| CDN-E   | 2                  | 1                   | 1                  | 1              | 3                    | -              |
| Total   | 14                 | 11                  | 7                  | 6              | 10                   | 10             |

**Supplementary Table 19. Samples used for RNA-seq**

| Sample                                      | Sample No. |
|---------------------------------------------|------------|
| Germinating seeds (24 h to 120 h mixed)     | Sample1    |
| Stem (1 month post-germination)             | Sample2    |
| Young leaf (top two from 1-month-old plant) | Sample3    |
| Old leaf (from plant at flowering stage)    | Sample4    |
| Flower and flower bud (-3 to 0 DPA)         | Sample5    |
| Leaf bud                                    | Sample6    |
| Ovule -3 DPA                                | Sample7    |
| Ovule -2 DPA                                | Sample8    |
| Ovule -1 DPA                                | Sample9    |
| Ovule 0 DPA                                 | Sample10   |
| Ovule 1 DPA                                 | Sample11   |
| Ovule 2 DPA                                 | Sample12   |
| Ovule 3 DPA                                 | Sample13   |
| Ovule 5 DPA                                 | Sample14   |
| Ovule 10 DPA                                | Sample15   |
| Ovule 20 DPA                                | Sample16   |
| Ovule 30 DPA                                | Sample32   |
| Ovule 35 DPA                                | Sample17   |
| Ovule 45 DPA                                | Sample33   |
| Fiber 5 DPA                                 | Sample18   |
| Fiber 10 DPA                                | Sample19   |
| Fiber 20 DPA                                | Sample20   |
| Fiber 30 DPA                                | Sample21   |
| Root (12 h post germination)                | Sample27   |
| Root (24 h post germination)                | Sample28   |
| Root (48 h post germination)                | Sample29   |
| Root (96 h post germination)                | Sample30   |
| Root (144 h post germination)               | Sample31   |

DPA: days post-anthesis.
